# Supplementary material for: Dillapiole, Isolated from Peperomia pellucida, Shows Gastroprotector Activity against Ethanol-Induced Gastric Lesions in Wistar Rats
Source: PubMed Central journal article supplement (PMC6269875; doi:10.3390/molecules180911327), 2013-09-13

010913  
Maria Elena

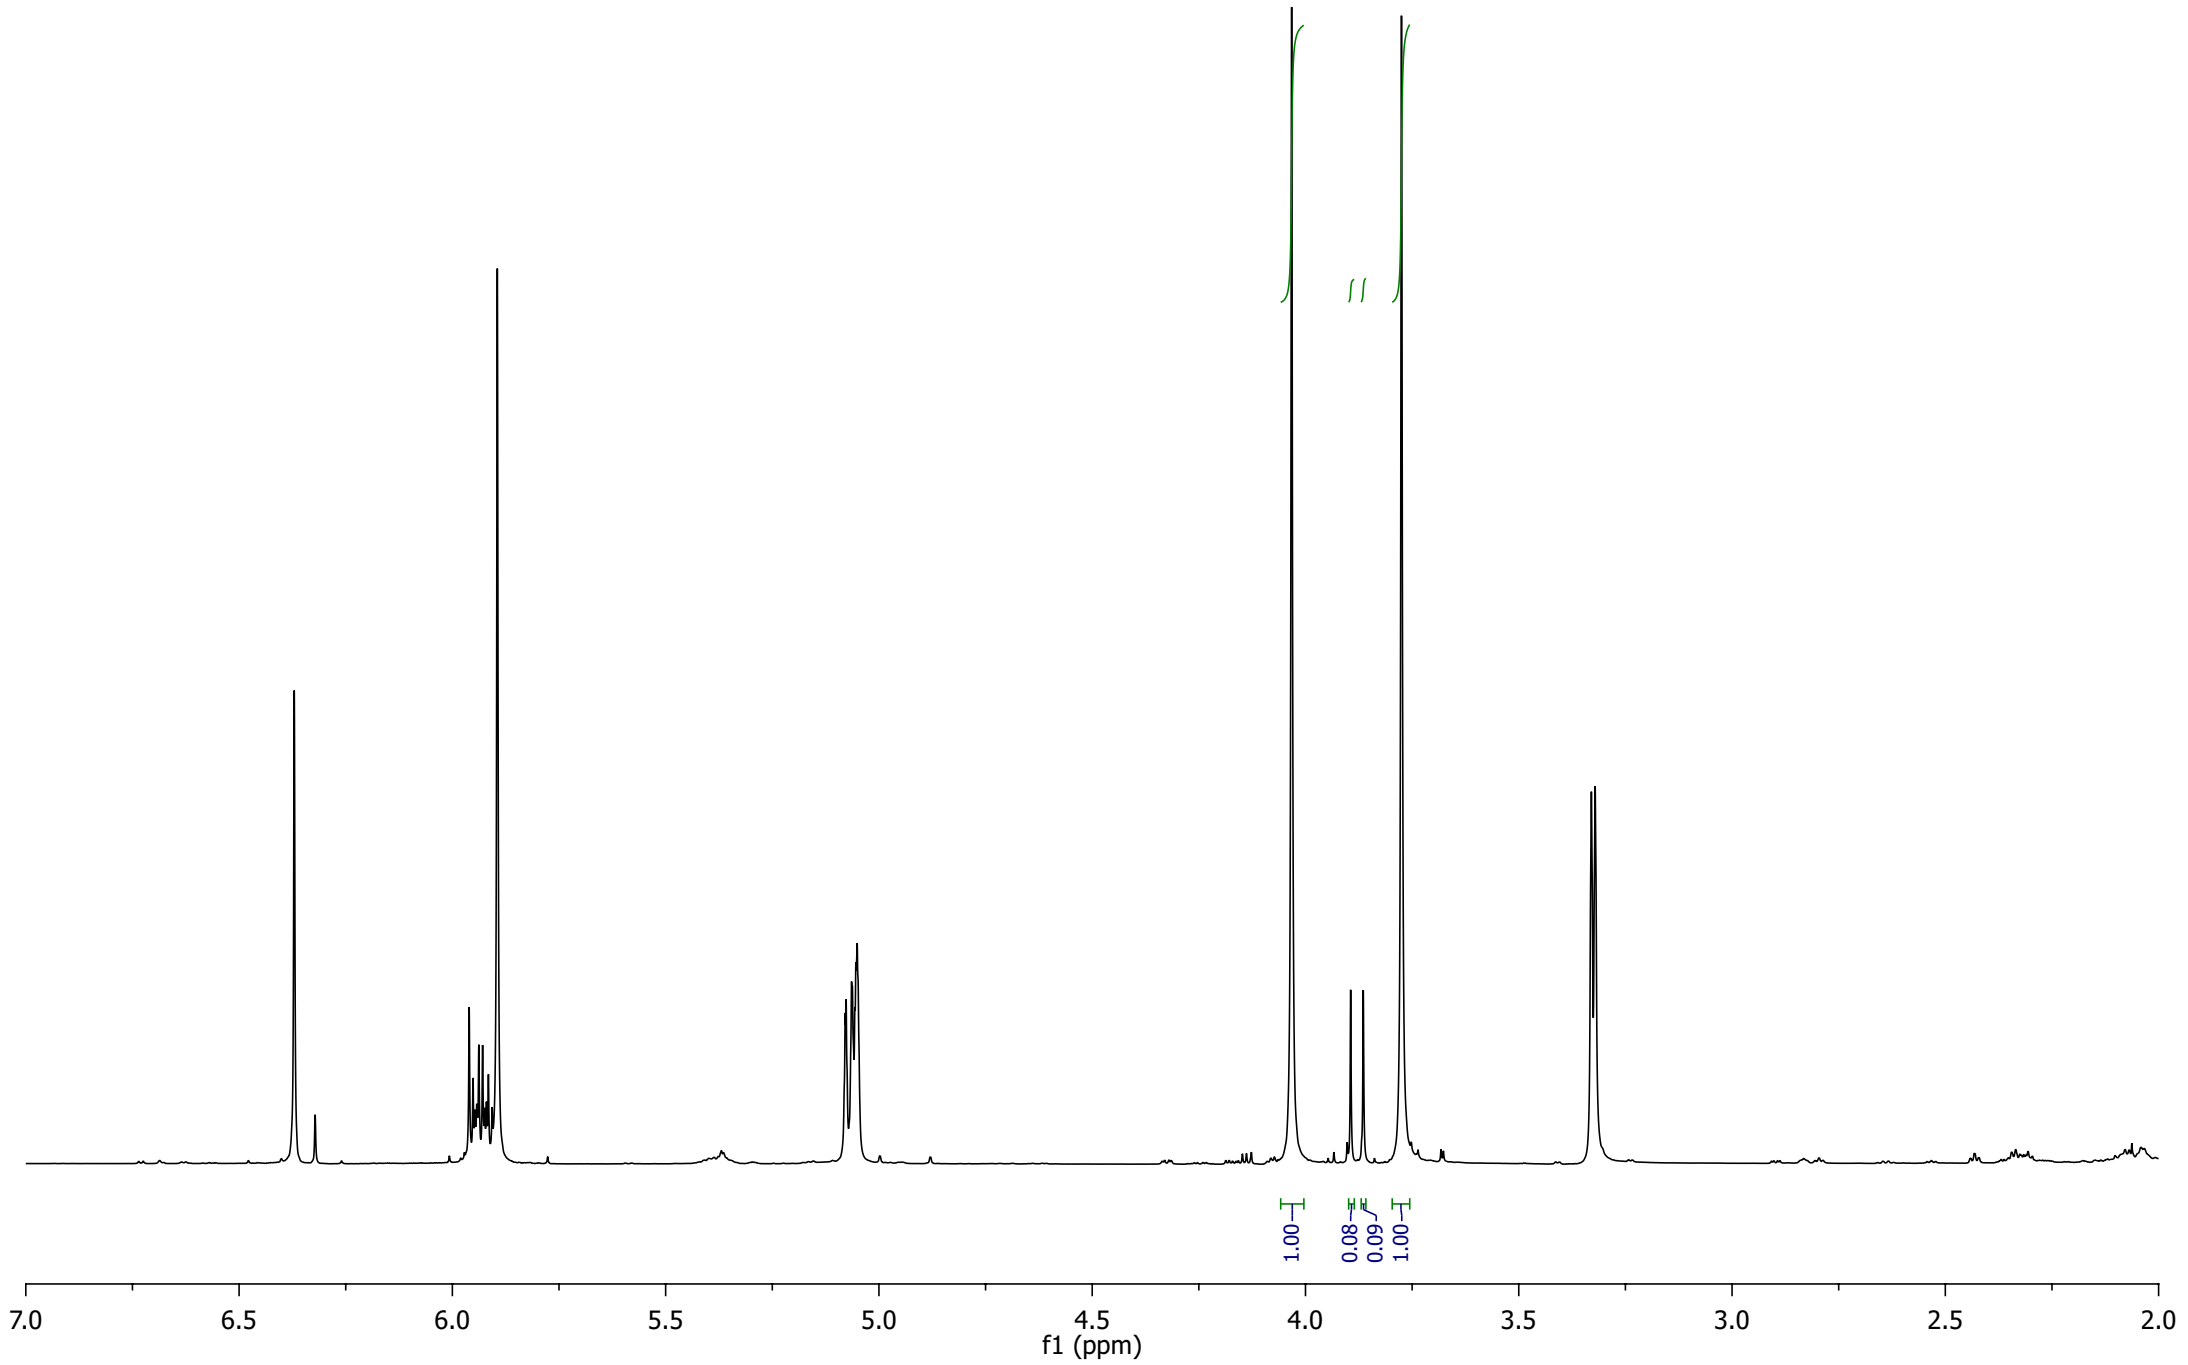

Supplement: molecules-18-11327-s001.pdf [file molecules-18-11327-s001.pdf]
